# Supplementary material for: Acylglycerol kinase augments JAK2/STAT3 signaling in esophageal squamous cells
Source: JCI journal article supplement (doi:10.1172/jci68143), 2013-05-07
Supplement: sd1 [file 1]

## Supplemental Materials and Methods

**RNA extraction, reverse transcription (RT) and real-time PCR.** Total RNA from cultured cells was extracted using the Trizol reagent (Invitrogen, Carlsbad, CA) as the manufacturer instructed. cDNAs were amplified and quantified in Bio-Rad CFX qRT-PCR detection system (Applied Biosystems Inc., Foster City, CA, USA), using FastStart Universal SYBR Green Master (ROX; Roche, Toronto, ON, Canada). Expression data were normalized to the geometric mean of housekeeping gene *GAPDH* to control the variability in expression levels and calculated as  $2^{-(C_t \text{ of gene}) - (C_t \text{ of GAPDH})}$ , where  $C_t$  represents the threshold cycle for each transcript.

**Immunohistochemistry (IHC).** Paraffin-embedded tissues were analyzed using IHC with AGK antibody (Epitomics, Burlingame, CA, 1:500), p-STAT3 (Tyr705) antibody (Cell Signaling, Danvers, MA, 1:400), p-JAK2 (1007-1008) antibody (Epitomics, Burlingame, CA, 1:200). The degree of immunostaining of formalin-fixed, paraffin-embedded sections were reviewed and scored separately by two independent pathologists uninformed of the histopathological features and patient data of the samples. The scores were determined by combining the proportion of positively-stained tumor cells and the intensity of staining. The scores given by the two independent pathologists were combined into a mean score for further comparative evaluation. Tumor cell proportions were scored as follows: 0, no positive tumor cells; 1, <10% positive tumor cells; 2, 10%–35% positive tumor cells; 3, 35%–75% positive tumor cells; 4, >75% positive tumor cells. Staining intensity was graded according to the following standard: 1, no staining; 2, weak staining (light yellow); 3, moderate staining (yellow brown); 4, strong staining (brown). The staining index (SI) was calculated as the product of the staining intensity score and the proportion of positive tumor cells. Using this method of assessment, we evaluated protein expression in benign esophageal epithelia and malignant lesions by determining the SI, with possible scores of 0, 2,

3, 4, 6, 8, 9, 12, and 16. Samples with a  $SI \geq 8$  were determined as high expression and samples with a  $SI < 8$  were determined as low expression. Cutoff values were determined on the basis of a measure of heterogeneity using the log-rank test with respect to overall survival.

### Primers and Oligonucleotides

| Used for subcloning and plasmid construction: |                                                                    |
|-----------------------------------------------|--------------------------------------------------------------------|
| HA tagged JAK2 and JAK2 fragments             |                                                                    |
| JAK2-UP                                       | GCCGGATCCGCCATGTACCCATACGACGTCCCAGACT<br>ACGCTGGAATGGCCTGCCTTACGAT |
| JAK2-DN                                       | GGCGCGGCCGCTCATCCAGCCATGTTATCCCTTATTT<br>GATCCAC                   |
| JH1-UP                                        | GCCGGTACCGCCATGTACCCATACGACGTCCCAGACT<br>ACGCTTTGTTTACTCCAGATTA    |
| JH1-DN                                        | GGCGAATTCTCATCCAGCCATGTTATCCC                                      |
| JH2-UP                                        | GCCGGATCCGCCATGTACCCATACGACGTCCCAGACT<br>ACGCTGTGTTTCACAAAATCAG    |
| JH2-DN                                        | GGCGAATTCTCAACTGTTAAGATCTCGTATG                                    |
| JH3-7-UP                                      | GCCGGTACCGCCATGTACCCATACGACGTCCCAGACT<br>ACGCTATGGGAATGGCCTGCCTTAC |
| JH3-7-DN                                      | GGCGGATCCTCACATTTGGTTCATATGAGTAGG                                  |
| Flag tagged AGK                               |                                                                    |
| pSin Flag-AGK-up                              | GCCGGATCCGCCATGGACTACAAGGACGACGATGA<br>CAAGACGGTGTTCTTTAAAACGCT    |
| pSin Flag-AGK-dn                              | GGCACTAGTTCACTGGGTGGGGCTTGTGAGCATC                                 |
| shRNA                                         |                                                                    |
| pSuper Retro<br>AGK-RNAi#1-up                 | GATCCCCGAGAGACCAGTAGTTTGATTCAAGAGAT<br>CAAATACTGGTCTCTCCTTTTAA     |
| pSuper Retro<br>AGK-RNAi#1-dn                 | AGCTTAAAAAGGAGAGACCAGTAGTTTGATCTCTTG<br>AATCAAATACTGGTCTCTCCGGG    |
| pSuper Retro                                  | GATCCCCGAGGCTACCTTCAGTAAGATTCAAGAGAT                               |

|                                |                                                                       |
|--------------------------------|-----------------------------------------------------------------------|
| AGK-RNAi#2-up                  | CTTACTGAAGGTAGCCTCTTTTTA                                              |
| pSuper Retro<br>AGK-RNAi#2-dn  | AGCTTAAAAAGAGGCTACCTTCAGTAAGATCTCTTG<br>AATCTTACTGAAGGTAGCCTCGGG      |
| pSuper Retro<br>JAK2-RNAi#1-up | GATCCCCGAAATATATTGGTGGAGAATTCAAGAGAT<br>TCTCCACCAATATATTTCTTTTTA      |
| pSuper Retro<br>JAK2-RNAi#1-dn | AGCTTAAAAAGAAATATATTGGTGGAGAATCTCTTG<br>AATTCTCCACCAATATATTTTCGGG     |
| pSuper Retro<br>JAK2-RNAi#2-up | GATCCCCGCCAGAACTTGAACTTATTCAAGAGAT<br>AAGTTTCAAGTTTCTGGCTTTTTA        |
| pSuper Retro<br>JAK2-RNAi#2-dn | AGCTTAAAAAGCCAGAACTTGAACTTATCTCTTG<br>AATAAGTTTCAAGTTTCTGGCGGG        |
| pSuper Retro<br>STAT3-RNAi-up  | GATCCCCGCACAATCTACGAAGAATCAATTCAAGAG<br>ATTGATTCTTCGTAGATTGTGCTTTTTA  |
| pSuper Retro<br>STAT3-RNAi-dn  | AGCTTAAAAAGCACAATCTACGAAGAATCAATCTCT<br>TGAATTGATTCTTCGTAGATTGTGCGGG  |
| <b>AGK G126E mutation</b>      |                                                                       |
| pSin Flag-AGK-G126E-up         | GATCATTGTTGCAGGAGGAGATGAGACACTGCAGGA<br>GGTTGTTACTG                   |
| pSin Flag-AGK-G126E-dn         | CAGTAACAACCTCCTGCAGTGTCTCATCTCCTCCTGC<br>AACAATGATC                   |
| <b>His-tagged AGK</b>          |                                                                       |
| pET-19b AGK-up                 | GCCCATATGATGACGGTGTTCTTTAAAACGCTTCG                                   |
| pET-19b AGK-dn                 | GGCGGATCCTCACTGGGTGGGGCTTGTGAGCATCTG                                  |
| <b>Luciferase reporter</b>     |                                                                       |
| pTAL STAT3-Luc-up              | CGCGTGCTTCCCGAATTCCCGAATTCCCGAATTCCC<br>GAATTCCCGAATTCCCGAACGTG       |
| pTAL STAT3-Luc-dn              | GATCCACGTTTCGGGAATTTCGGGAATTTCGGGAATTTCG<br>GGAATTTCGGGAATTTCGGGAAGCA |
| <b>Used for qPCR</b>           |                                                                       |
| AGK-up                         | CTTGACAGGCTGCTCTCCTT                                                  |
| AGK-dn                         | GGAAGAAACTACAGCTGGGC                                                  |
| ABCG2-up                       | TGGTGTTTCCTTGTGACACTG                                                 |
| ABCG2-dn                       | TGAGCCTTTGGTTAAGACCG                                                  |
| SOX2-up                        | GCTTAGCCTCGTCGATGAAC                                                  |
| SOX2-dn                        | AACCCCAAGATGCACAACCTC                                                 |

|                            |                        |
|----------------------------|------------------------|
| OCT4-up                    | GGTTCTCGATACTGGTTCGC   |
| OCT4-dn                    | GTGGAGGAAGCTGACAACAA   |
| NANOG-up                   | ATGGAGGAGGGAAGAGGAGA   |
| NANOG-dn                   | GATTTGTGGGCCTGAAGAAA   |
| BMI1-up                    | TCGTTGTTTCGATGCATTTCT  |
| BMI1-dn                    | CTTTCATTGTCTTTTCCGCC   |
| ABCB7-up                   | TTGCCTTTTCCCAATCTCTG   |
| ABCB7-dn                   | AGTGGAGGCCACATCAACTC   |
| TLS-up                     | TCATGACGTGATCCTTGGTC   |
| TLS-dn                     | CAGCAGTGGTGGCTATGAAC   |
| RPA1-up                    | AGCTTCCATTCTGCGGC      |
| RPA1-dn                    | GGCAATCCAGTGCCTATAA    |
| IGF2BP1-up                 | TTTCGGATTTGAATTTTCCG   |
| IGF2BP1-dn                 | AGGCCATCGAACTTTCTCC    |
| IGF2BP2-up                 | CAGGTGAGGAGGGATGTTTC   |
| IGF2BP2-dn                 | AAAGTGGAATTGCATGGGAA   |
| SLC25A6-up                 | GATGCCCTTGTACTGCTTGTC  |
| SLC25A6-dn                 | GCCGCCATCTCCAAGAC      |
| C14orf166-up               | TGCATTGTCAGCAGTTTTTGA  |
| C14orf166-dn               | TGACTGGCTTCTTGGTTTAGC  |
| <b>siRNA</b>               |                        |
| siABCB7                    | CGGTGGAGAACTAGATTTA    |
| siTLS                      | CGAACAGGATAATTCAGACAA  |
| siRPA1                     | GTCATCAACATCCGTCCCATT  |
| siIGF2BP1                  | CCTGGCCCATAATAACTTTGT  |
| siIGF2BP2                  | CGGATCTTTGGGAAACTGAAA  |
| siSLC25A6                  | CGACAAGCAGTACAAGGGCAT  |
| siC14orf166                | GCAGTTGCTAAGGCAAATCAA  |
| <b>Used for EMSA probe</b> |                        |
| STAT3-up                   | TCGACATTTCCCGTAAATC    |
| STAT3-dn                   | GATTTACGGGAAATGTCTGA   |
| OCT-1-up                   | TGTCGAATGCAAATCACTAGAA |
| OCT-1-dn                   | TTCTAGTGATTTGCATTCGACA |

## Supplemental Figure Legends

### **Supplemental Figure 1. Mass-spectrometric peptide sequencing of JH2-interacting proteins and identification of their effects on STAT3 transcriptional activity.**

**(A)** Representative mass spectrometry plots and sequences of the peptides from potent JH2-interacting proteins identified from the JH2 precipitate presented in Figure 1A. **(B)** Expression of mRNA and STAT3 luciferase reporter activity following silencing of potent JH2-interacting proteins identified from the JH2 precipitate presented in Figure 1A. Error bars represent the mean  $\pm$ SD of three independent experiments, \*  $P < 0.05$ .

### **Supplemental Figure 2. AGK expression correlates with STAT3 activity in ESCC**

**datasets.** GSEA plot showing significant correlations between AGK expression and the STAT3-activated gene signatures (DAUER\_STAT3\_TARGETS\_UP, V\$STAT3\_01/02) or STAT3-suppressed gene signatures (DAUER\_STAT3\_TARGETS\_Dn) in a published cohort of ESCC gene expression profiles (statistic performed within tumor tissues from GSE20347/29001/33426,  $n = 109$ ).

**Supplemental Figure 3. Overexpression of AGK enhances the strength and duration of STAT3 activation.** **(A-H)** Western blotting analysis of the expression of p-STAT3 (Tyr705) and total STAT3 in the indicated cells treated with IL-6 (1 ng/ml) for various times (0-480 min). GAPDH was used as a loading control.

**Supplemental Figure 4. AGK promotes the stem cell population and stem cell-like phenotype in ESCC.** Representative images of spheres formed by AGK transduced- or AGK silenced-cells taken on day 4, 6, 8, 10. Scale bar: 100  $\mu$ m.

**Supplemental Figure 5. SP<sup>+</sup> cells and CD44<sup>+</sup> cells sorted from ESCC cells display a higher sphere forming efficiency and express higher levels of pluripotency-associated factors.** **(A)** Flow cytometry analysis of the CD44<sup>+</sup> population in the indicated cells. **(B)**

Number of spheres formed by SP<sup>+</sup> or SP<sup>-</sup> cells (left panel) or CD44<sup>+</sup> or CD44<sup>-</sup> cells (right panel) sorted from the indicated ESCC cells. (C) Real-time PCR analysis of the mRNA expression levels of pluripotency-associated factors in the indicated cell populations. Error bars represent the mean  $\pm$ SD of three independent experiments, \*  $P < 0.05$ .

**Supplemental Figure 6. AGK and JAK2 promote the CD44<sup>+</sup> population in ESCC.** (A)

Overexpression of AGK enhanced, whereas silencing AGK decreased, the CD44<sup>+</sup> population sorted from the indicated ESCC cells. (B) Silencing JAK2 decreased the CD44<sup>+</sup> population sorted from the indicated ESCC cells.

**Supplemental Figure 7. JAK2-STAT3 signaling is required for the promoting effect of**

**AGK on cancer stem cell-associated phenotypes.** (A) Representative images of spheres formed by AGK overexpressing-cells infected with vector or JAK2 RNAi(s) taken on day 4, 6, 8, 10. Scale bar: 100  $\mu$ m. (B) Silencing JAK2 decreased the CD44<sup>+</sup> population sorted from the indicated AGK-transduced ESCC cells. (C) Representative images of spheres formed by AGK overexpressing-cells infected with vector or STAT3 RNAi(s) taken on day 4, 6, 8, 10. Scale bar: 100  $\mu$ m.

**Supplemental Figure 8. Inhibition of JAK2 activity abrogates the ability of AGK to**

**promote cancer stem cell-associated phenotypes.** (A and B) Western blotting analysis of p-STAT3 (Tyr705) expression (A) or real-time PCR analysis of the expression of pluripotency associated markers (B) in the indicated cells treated with JAK2 inhibitor III (10  $\mu$ M) for the indicated times. (C and D) Western blotting analysis of p-STAT3 (Tyr705) expression (C) and real-time PCR analysis of the expression of pluripotency associated markers (D) in the indicated cells treated with the indicated concentrations of JAK2 inhibitor III for 24 h. (E and F) Western blotting analysis of p-STAT3 (Tyr705) expression (E) and real-time PCR analysis of the expression of pluripotency associated markers (F) in the

indicated cells treated with JAK2 inhibitor II (100  $\mu$ M) for the indicated times. **(G and H)** Western blotting analysis of p-STAT3 (Tyr705) expression (G) and real-time PCR analysis of the expression of pluripotency associated markers (H) in the indicated cells treated with the indicated concentrations of JAK2 inhibitor II for 16 h.  $\alpha$ -tubulin was used as a loading control. Error bars represent the mean  $\pm$ SD of three independent experiments, \*  $P < 0.05$ .

**Supplemental Figure 9. Expression of AGK mRNA is elevated in ESCC cell lines and tissues.** **(A)** Real-time PCR analysis of AGK mRNA in 2 primary cultured human normal esophageal epithelial cells (NEECs) and 11 ESCC cell lines. **(B)** Real-time PCR analysis of AGK mRNA in 8 paired primary ESCC tissues (T) and the matched adjacent non-tumor tissues (ANT) from the same patient.

**Supplemental Figure 10. AGK expression and JAK2-STAT3 activity correlate with the expression levels of pluripotency-associated factors in ESCC tissues.** **(A)** Real-time PCR analysis of the mRNA expression of pluripotency-associated factors, including *ABCG2*, *SOX2*, *OCT4*, *NANOG*, *BM11* and *CD44*, in 8 freshly collected human ESCC samples. **(B and C)** AGK expression (B) and JAK2-STAT3 activity (C) correlated significantly with the expression levels of pluripotency associated factors in freshly collected ESCC tissues. **(D)** GSEA plot showing that AGK levels positively correlated with the expression of pluripotency-associated factors, between normal and tumor tissues (left panel) and within tumor tissues (right panel), through an analysis of published ESCC patient profiles.

**Supplemental Figure 11. AGK levels correlate with STAT3 activity in lung cancer and breast cancer datasets.** **(A-B)** GSEA plot showing significant correlations between AGK expression and the STAT3-activated gene signatures (DAUER\_STAT3\_TARGETS\_UP, V\$STAT3\_01/02) or STAT3-suppressed gene signatures (DAUER\_STAT3\_TARGETS\_Dn) in published lung cancer gene expression profiles (statistic performed within tumor tissues

from GSE10245/19804/28571/31210,  $n = 464$ ) (A) and breast patient gene expression profiles (statistic performed within tumor tissues from E-TABM-1186,  $n = 354$ ) (B).

**Supplemental Figure 12. Expression of IL6 does not correlate with STAT3 activation in clinical ESCC specimens.** GSEA plot showing no significant correlation between IL6 expression and the STAT3-activated gene signatures (DAUER\_STAT3\_TARGETS\_UP, V\$STAT3\_01/02) or STAT3-suppressed gene signatures (DAUER\_STAT3\_TARGETS\_Dn) in published ESCC patient gene expression profiles (NCBI/GEO/GSE20347 and GSE29001,  $n = 79$ ).



**Supplemental Table 1. Clinicopathological characteristics and expression of AGK in ESCC patients**

|                         | Number of cases (%) |
|-------------------------|---------------------|
| <b>Gender</b>           |                     |
| Male                    | 189(76.5)           |
| Female                  | 58(23.5)            |
| <b>Age (years)</b>      |                     |
| $\leq 57$               | 132(53.4)           |
| $>57$                   | 115(46.6)           |
| <b>Clinical stage</b>   |                     |
| I                       | 36(14.6)            |
| IIA                     | 83(33.6)            |
| IIB                     | 32(13.0)            |
| III                     | 70(28.3)            |
| IV                      | 26(10.5)            |
| <b>T classification</b> |                     |
| T1                      | 36(14.6)            |
| T2                      | 63(25.5)            |
| T3                      | 138(55.9)           |
| T4                      | 10(4.0)             |
| <b>N classification</b> |                     |
| N0                      | 135(54.7)           |
| N1                      | 110(44.5)           |
| N2                      | 2(0.8)              |

---

|                                    |           |
|------------------------------------|-----------|
| <b>M classification</b>            |           |
| M0                                 | 221(89.5) |
| M1                                 | 26(10.5)  |
| <b>Tumor grade</b>                 |           |
| G1                                 | 76(30.8)  |
| G2                                 | 107(43.3) |
| G3                                 | 64(25.9)  |
| <b>Vital status (at follow-up)</b> |           |
| Alive                              | 82(33.2)  |
| Death (tumor-related)              | 163(66.0) |
| Death (tumor-unrelated)            | 2(0.8)    |
| <b>Expression of AGK</b>           |           |
| Low expression                     | 127(51.4) |
| High expression                    | 120(48.6) |
| <b>Location</b>                    |           |
| Upper                              | 22(8.9)   |
| Middle                             | 153(61.9) |
| Lower                              | 72(29.1)  |
| <b>Therapy</b>                     |           |
| Surgery only                       | 218(88.3) |
| CT or RT or CRT, +Surgery          | 29(11.7)  |
| <b>Recurrence or uncontrolled</b>  |           |
| No                                 | 117(47.4) |
| Yes                                | 130(52.6) |

---

**Supplemental Table 2. Correlations between AGK expression and clinicopathologic characteristics of ESCC patients**

| Characteristics         |        | AGK                     |                          | Chi-square test <i>P</i> -value |
|-------------------------|--------|-------------------------|--------------------------|---------------------------------|
|                         |        | Low<br>No. cases<br>(%) | High<br>No. cases<br>(%) |                                 |
| <b>Gender</b>           | Male   | 97(76.4)                | 92(76.7)                 | 0.957                           |
|                         | Female | 30(23.6)                | 28(23.3)                 |                                 |
| <b>Age (years)</b>      | ≤57    | 66(52.0)                | 66(55.0)                 | 0.633                           |
|                         | >57    | 61(48.0)                | 54(45.0)                 |                                 |
| <b>Clinical stage</b>   | I      | 27(21.3)                | 9(7.5)                   | <0.001                          |
|                         | IIA    | 53(41.7)                | 30(25.0)                 |                                 |
|                         | IIB    | 15(11.8)                | 17(14.2)                 |                                 |
|                         | III    | 29(22.8)                | 41(34.2)                 |                                 |
|                         | IV     | 3(2.4)                  | 23(19.2)                 |                                 |
| <b>T classification</b> | T1     | 27(21.3)                | 9(7.5)                   | 0.008                           |
|                         | T2     | 34(26.8)                | 29(24.2)                 |                                 |
|                         | T3     | 63(49.6)                | 75(62.5)                 |                                 |
|                         | T4     | 3(2.4)                  | 7(5.8)                   |                                 |
| <b>N classification</b> | N0     | 86(67.7)                | 49(40.8)                 | <0.001                          |
|                         | N1     | 40(31.5)                | 70(58.3)                 |                                 |
|                         | N2     | 1(0.8)                  | 1(0.8)                   |                                 |
| <b>M classification</b> | M0     | 124(97.6)               | 97(80.8)                 | <0.001                          |
|                         | M1     | 3(2.4)                  | 23(19.2)                 |                                 |
| <b>Tumor grade</b>      | G1     | 50(39.4)                | 26(21.7)                 | 0.002                           |
|                         | G2     | 54(42.5)                | 53(44.2)                 |                                 |
|                         | G3     | 23(18.1)                | 41(34.2)                 |                                 |

|                                       |                              |           |           |        |
|---------------------------------------|------------------------------|-----------|-----------|--------|
|                                       | Upper                        | 13(10.2)  | 9(7.5)    |        |
| <b>Location</b>                       | Middle                       | 74(58.3)  | 79(65.8)  | 0.453  |
|                                       | Lower                        | 40(31.5)  | 32(26.7)  |        |
|                                       | Surgery only                 | 111(87.4) | 107(89.2) |        |
| <b>Therapy</b>                        | CT or RT or CRT,<br>+Surgery | 16(12.6)  | 13(10.8)  | 0.667  |
|                                       | No                           | 70(55.1)  | 47(39.2)  |        |
| <b>Recurrence or<br/>uncontrolled</b> | Yes                          | 57(44.9)  | 73(60.8)  | 0.012  |
|                                       | Alive                        | 70(55.1)  | 12(10.0)  |        |
| <b>Vital status</b>                   | Death (tumor-related)        | 55(43.3)  | 108(90.0) | <0.001 |
|                                       | Death (tumor-unrelated)      | 2(1.6)    | 0(0.0)    |        |

**Supplemental Table 3. Univariate and multivariate analyses for 5-year overall survival**

|                          | Univariate analysis |                             | Multivariate analysis |               |                |
|--------------------------|---------------------|-----------------------------|-----------------------|---------------|----------------|
|                          | <i>P</i>            | Regression coefficient (SE) | <i>P</i>              | Relative risk | 95% confidence |
| <b>Clinical stage</b>    | <0.001              | 0.883(0.076)                | 0.002                 | 1.547         | 1.167-2.051    |
| <b>Expression of AGK</b> | <0.001              | 1.544 (0.173)               | <0.001                | 3.764         | 2.617-5.412    |
| <b>T classification</b>  | <0.001              | 0.672(0.113)                | 0.062                 | 1.298         | 0.987-1.708    |
| <b>N classification</b>  | <0.001              | 1.524(0.159)                | 0.004                 | 1.954         | 1.233-3.097    |
| <b>M classification</b>  | <0.001              | 1.949(0.237)                | 0.097                 | 1.737         | 0.904-3.338    |
| <b>Tumor grade</b>       | <0.001              | 0.429(0.107)                | 0.005                 | 1.383         | 1.106-1.729    |
| <b>Location</b>          | 0.428               | -0.103(0.130)               | 0.774                 | 1.043         | 0.784-1.387    |
| <b>Therapy</b>           | 0.845               | -0.046(0.234)               | 0.221                 | 0.744         | 0.463-1.195    |

**Supplemental Table 4. Univariate and multivariate analyses for 5-year disease-free survival**

|                          | Univariate analysis |                             | Multivariate analysis |               |                |
|--------------------------|---------------------|-----------------------------|-----------------------|---------------|----------------|
|                          | <i>P</i>            | Regression coefficient (SE) | <i>P</i>              | Relative risk | 95% confidence |
| <b>Clinical stage</b>    | <0.001              | 0.960(0.077)                | <0.001                | 2.113         | 1.589-2.809    |
| <b>Expression of AGK</b> | <0.001              | 1.510 (0.165)               | <0.001                | 4.077         | 2.864-5.805    |
| <b>T classification</b>  | <0.001              | 0.678(0.109)                | 0.308                 | 1.144         | 0.883-1.482    |
| <b>N classification</b>  | <0.001              | 1.559(0.152)                | 0.045                 | 1.580         | 1.009-2.474    |
| <b>M classification</b>  | <0.001              | 1.873(0.234)                | 0.916                 | 0.967         | 0.523-1.789    |
| <b>Tumor grade</b>       | <0.001              | 0.390(0.103)                | 0.016                 | 1.302         | 1.051-1.614    |
| <b>Location</b>          | 0.364               | -0.114(0.125)               | 0.457                 | 1.108         | 0.845-1.453    |
| <b>Therapy</b>           | 0.952               | 0.014(0.228)                | 0.402                 | 0.822         | 0.519-1.301    |

# Supplemental Figure 1

A

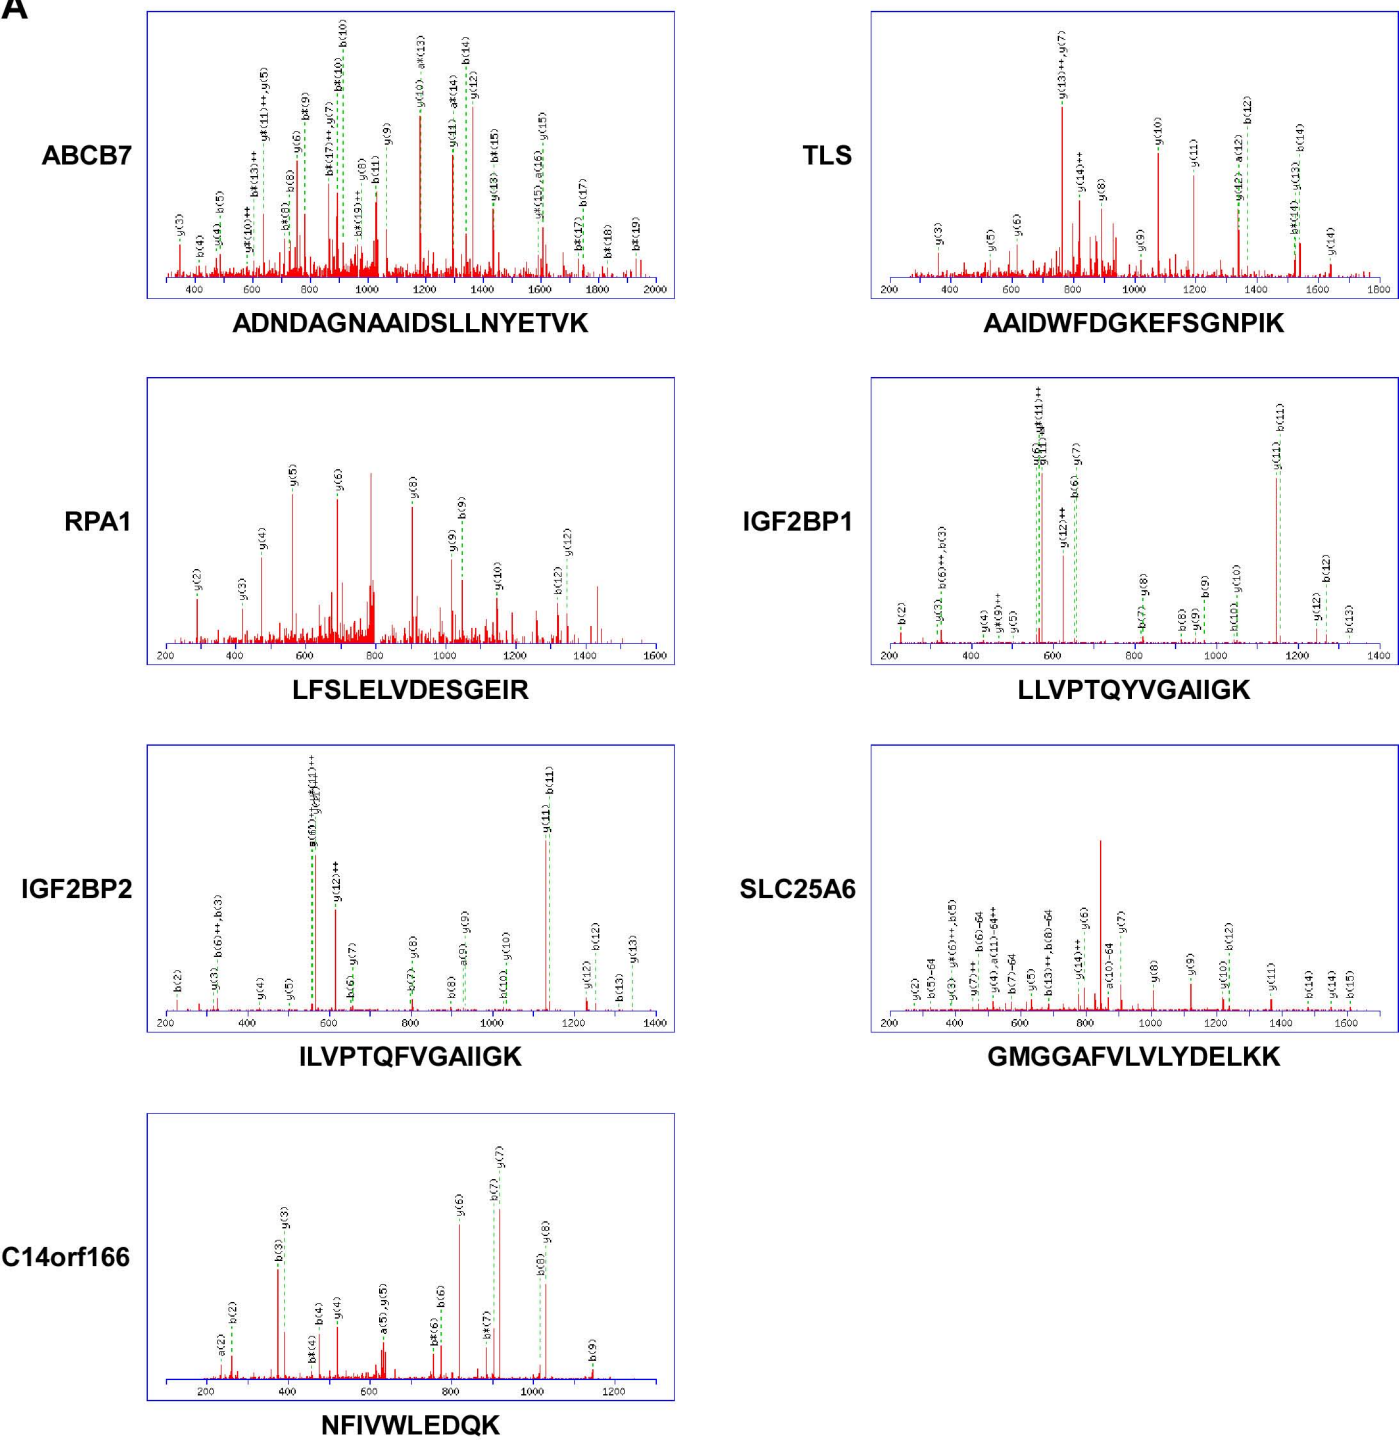

B

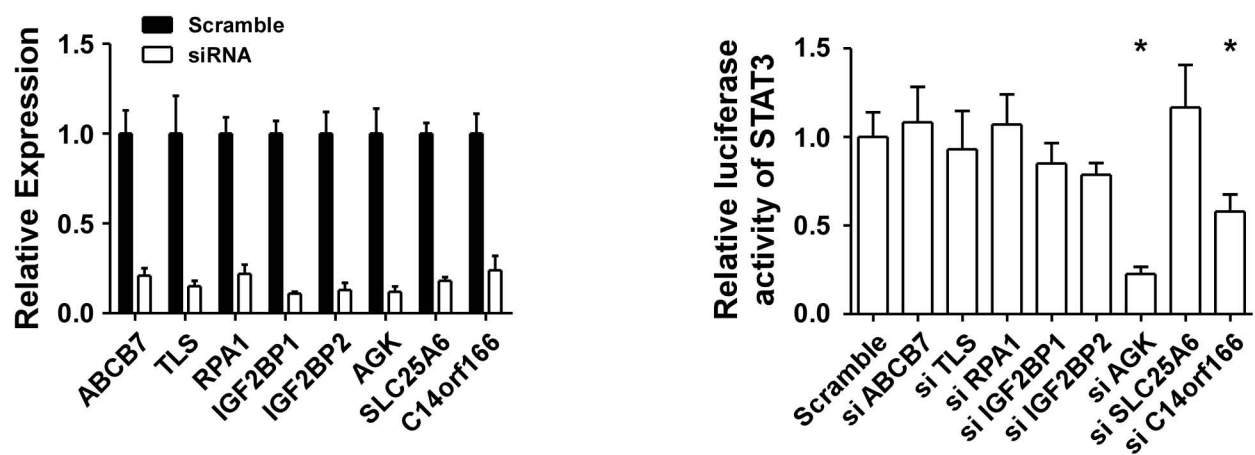

Supplemental Figure 1. Mass-spectrometric peptide sequencing of JH2-interacting proteins and identification of their effects on STAT3 transcriptional activity.

(A) Representative mass spectrometry plots and sequences of the peptides from potent JH2-interacting proteins identified from the JH2 precipitate presented in Figure 1A.

(B) Expression of mRNA and STAT3 luciferase reporter activity following silencing of potent JH2-interacting proteins identified from the JH2 precipitate presented in Figure 1A. Error bars represent the mean  $\pm$  SD of three independent experiments, \*  $P < 0.05$ .

## Supplemental Figure 2

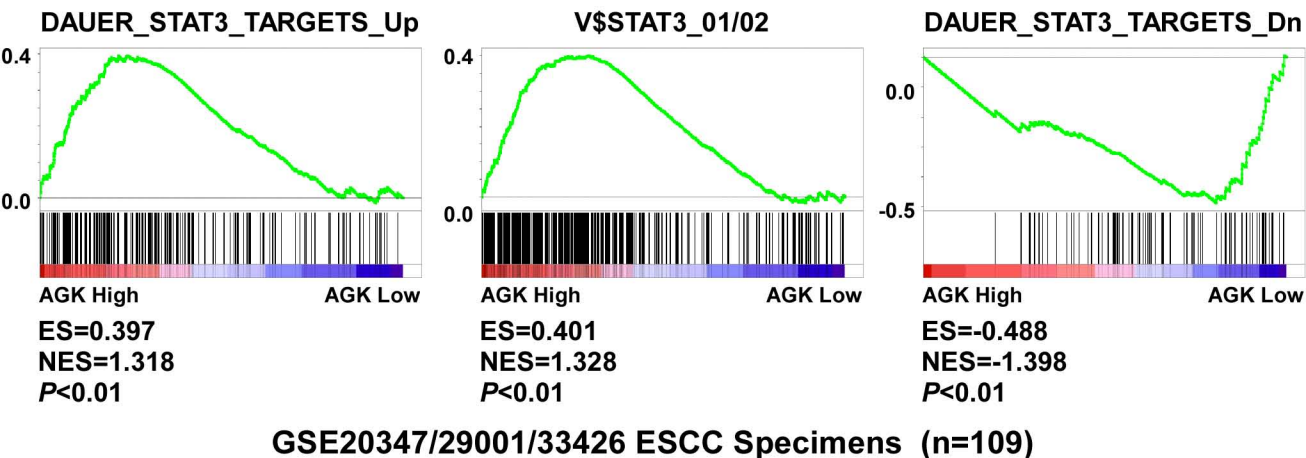

Supplemental Figure 2. AGK expression correlates with STAT3 activity in ESCC datasets. GSEA plot showing significant correlations between AGK expression and the STAT3-activated gene signatures (DAUER\_STAT3\_TARGETS\_UP, V\$STAT3\_01/02) or STAT3-suppressed gene signatures (DAUER\_STAT3\_TARGETS\_Dn) in a published cohort of ESCC gene expression profiles (statistic performed within tumor tissues from GSE20347/29001/33426,  $n = 109$ ).



# Supplemental Figure 3

**A**

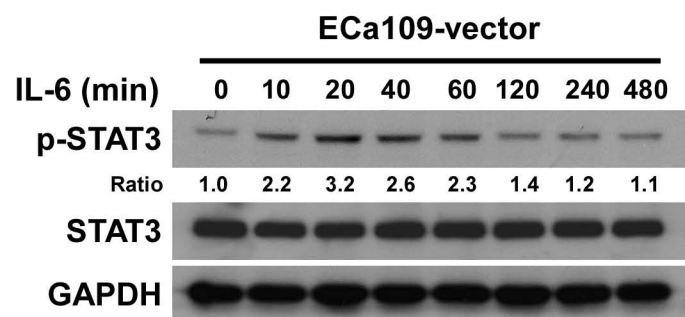

**B**

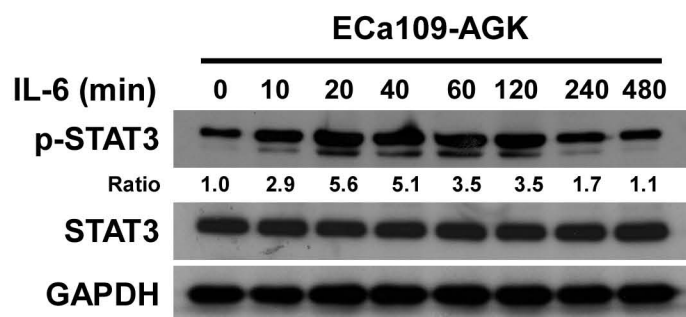

**C**

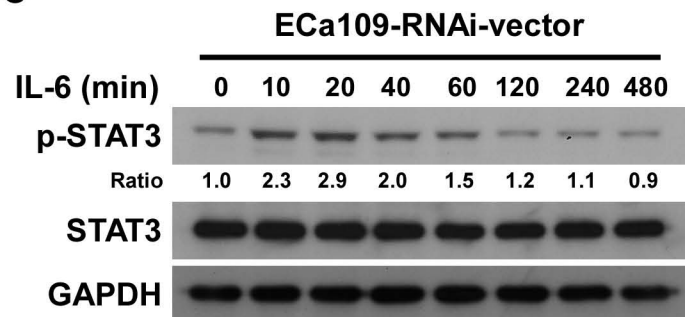

**D**

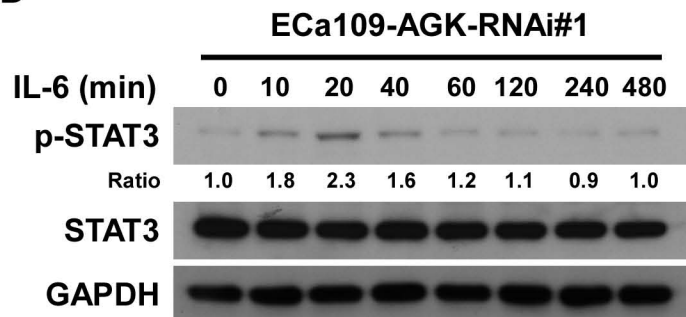

**E**

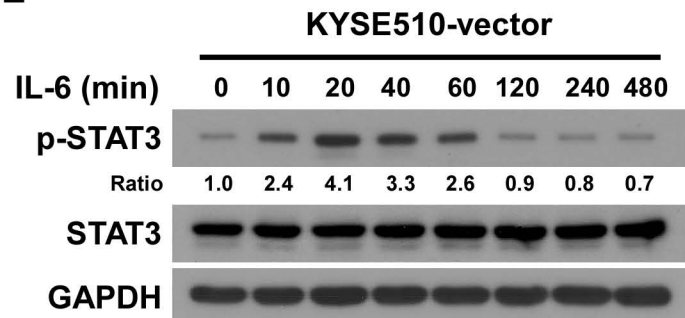

**F**

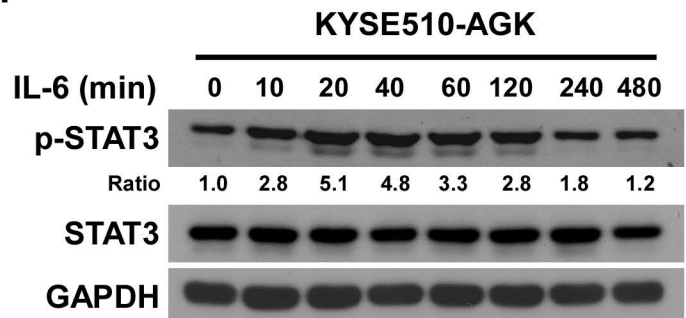

**G**

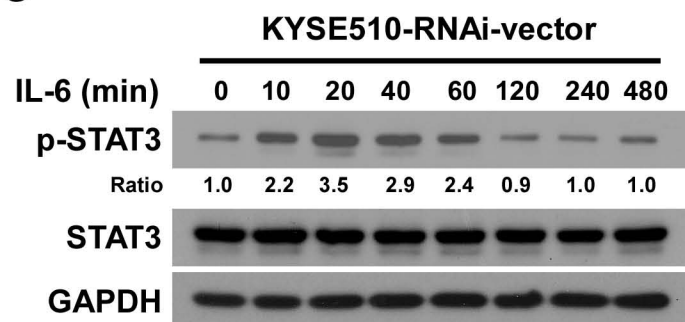

**H**

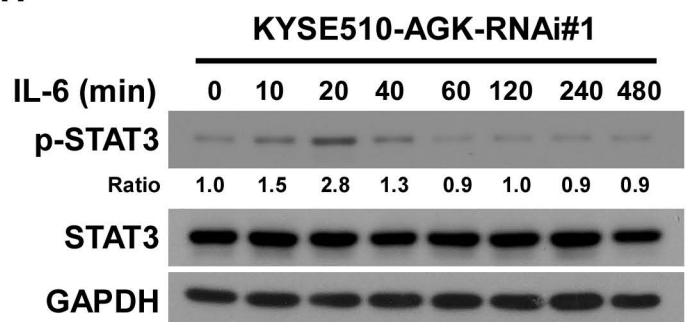

**Supplemental Figure 3. Overexpression of AGK enhances the strength and duration of STAT3 activation.**

(A-H) Western blotting analysis of the expression of p-STAT3 (Tyr705) and total STAT3 in the indicated cells treated with IL-6 (1 ng/ml) for various times (0-480 min). GAPDH was used as a loading control.

## Supplemental Figure 4

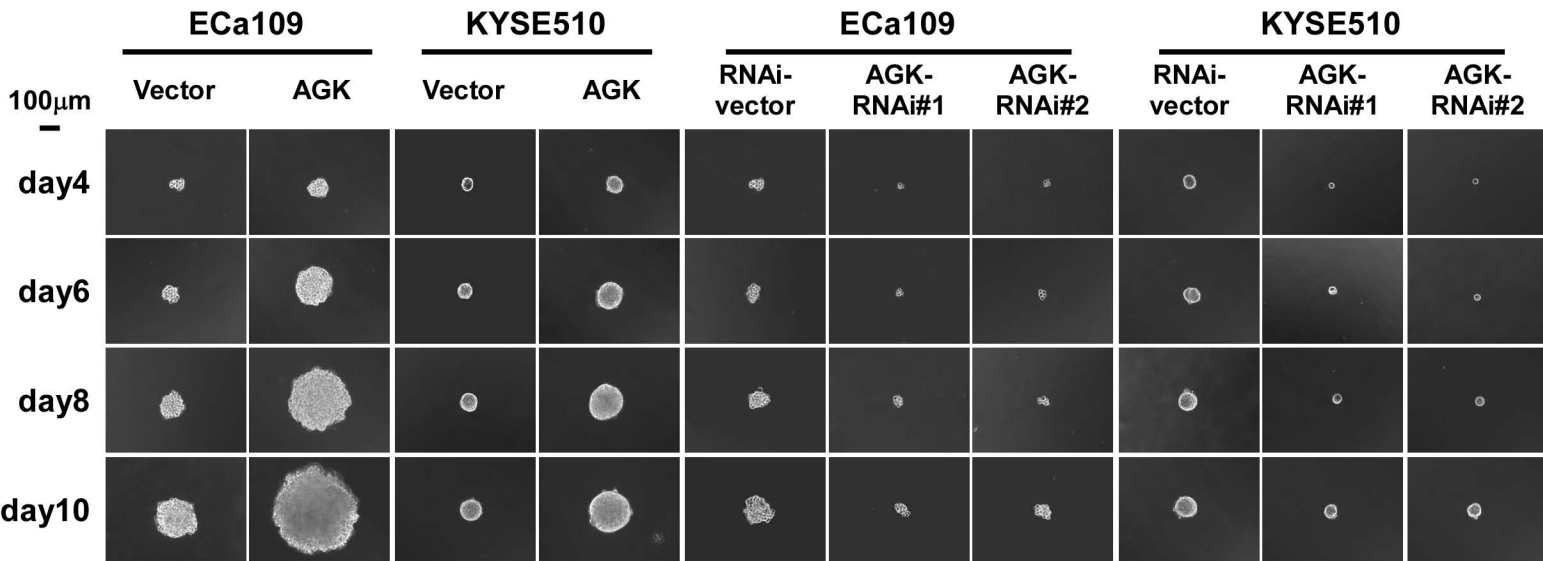

**Supplemental Figure 4. AGK promotes the stem cell population and stem cell-like phenotype in ESCC. Representative images of spheres formed by AGK transduced- or AGK silenced-cells taken on day 4, 6, 8, 10. Scale bar: 100  $\mu$ m.**

# Supplemental Figure 5

**A**

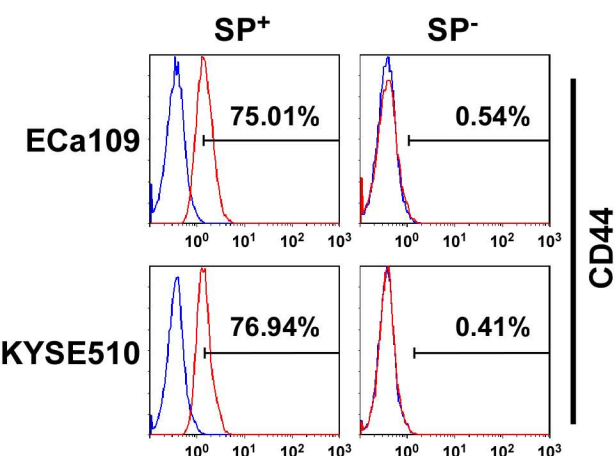

**B**

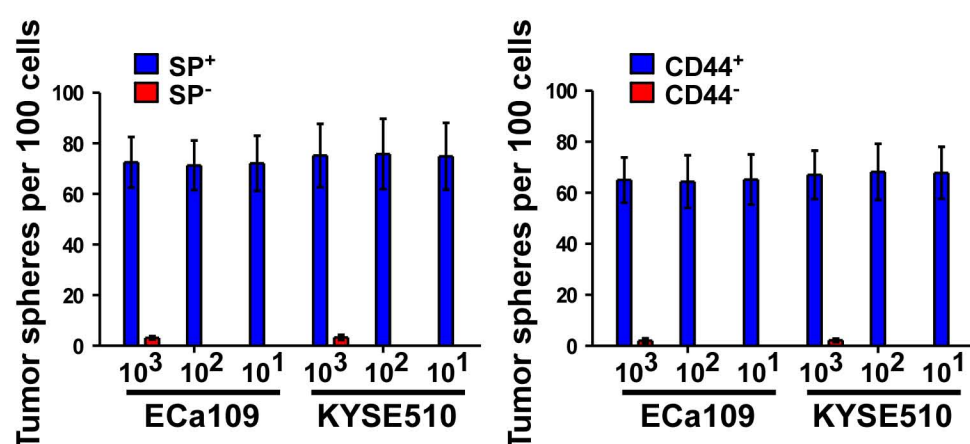

**C**

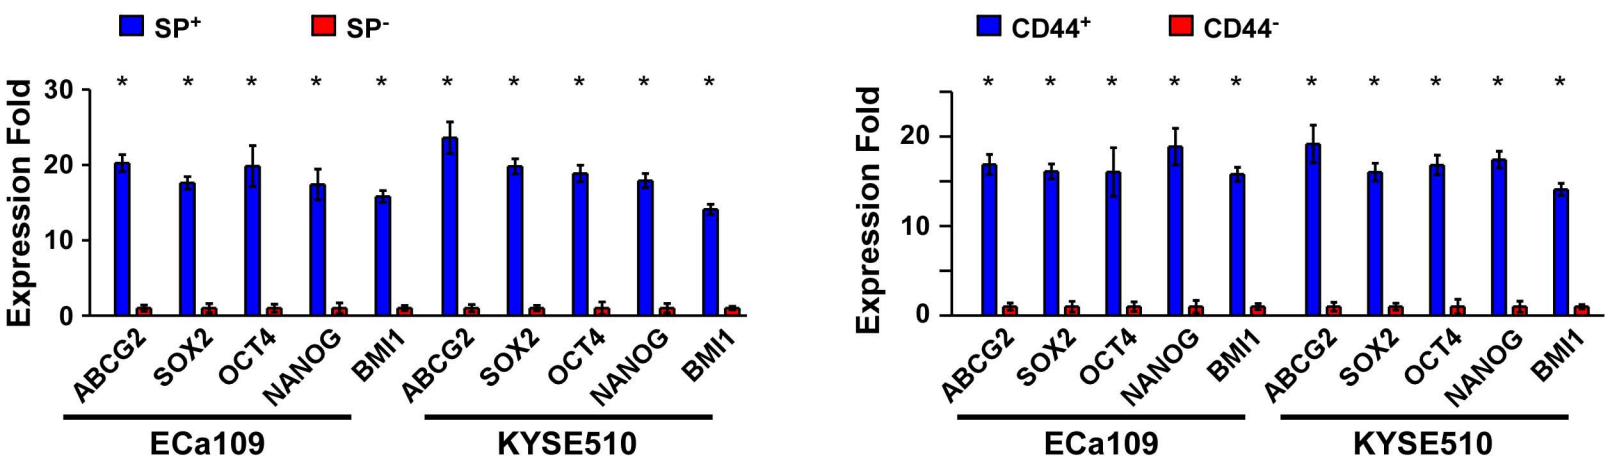

**Supplemental Figure 5. SP<sup>+</sup> cells and CD44<sup>+</sup> cells sorted from ESCC cells display a higher sphere forming efficiency and express higher levels of pluripotency-associated factors.**

**(A)** Flow cytometry analysis of the CD44<sup>+</sup> population in the indicated cells.

**(B)** Number of spheres formed by SP<sup>+</sup> or SP<sup>-</sup> cells (left panel) or CD44<sup>+</sup> or CD44<sup>-</sup> cells (right panel) sorted from the indicated ESCC cells.

**(C)** Real-time PCR analysis of the mRNA expression levels of pluripotency-associated factors in the indicated cell populations.

Error bars represent the mean  $\pm$  SD of three independent experiments, \*  $P < 0.05$ .

# Supplemental Figure 6

**A**

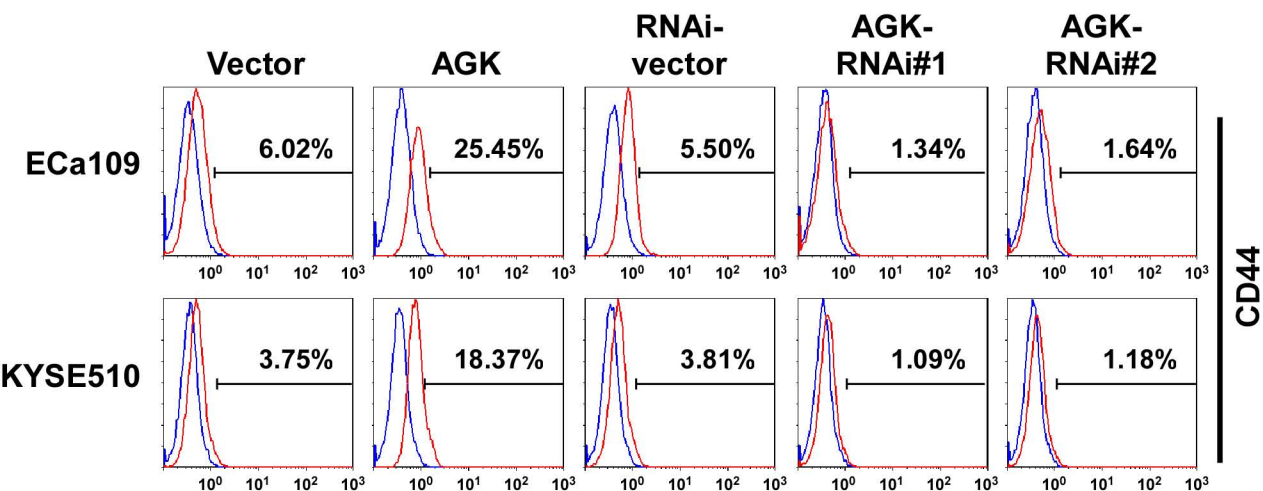

**B**

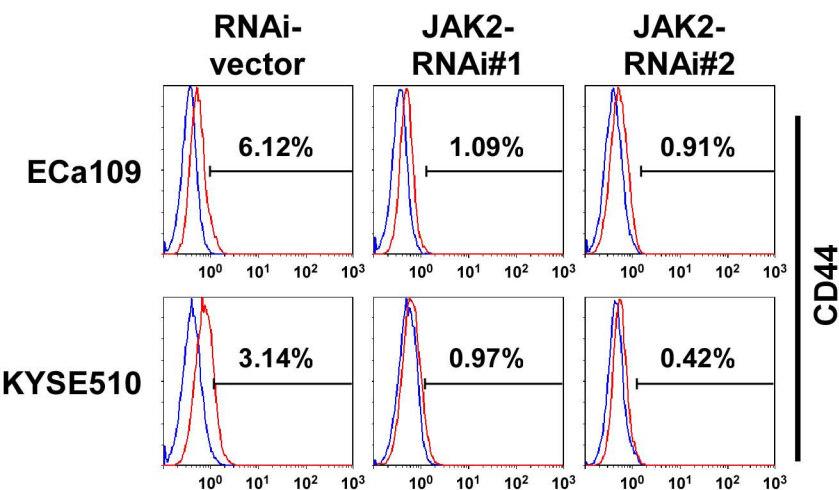

**Supplemental Figure 6. AGK and JAK2 promote the CD44<sup>+</sup> population in ESCC.**

**(A)** Overexpression of AGK enhanced, whereas silencing AGK decreased, the CD44<sup>+</sup> population sorted from the indicated ESCC cells.

**(B)** Silencing JAK2 decreased the CD44<sup>+</sup> population sorted from the indicated ESCC cells.

# Supplemental Figure 7

**A**

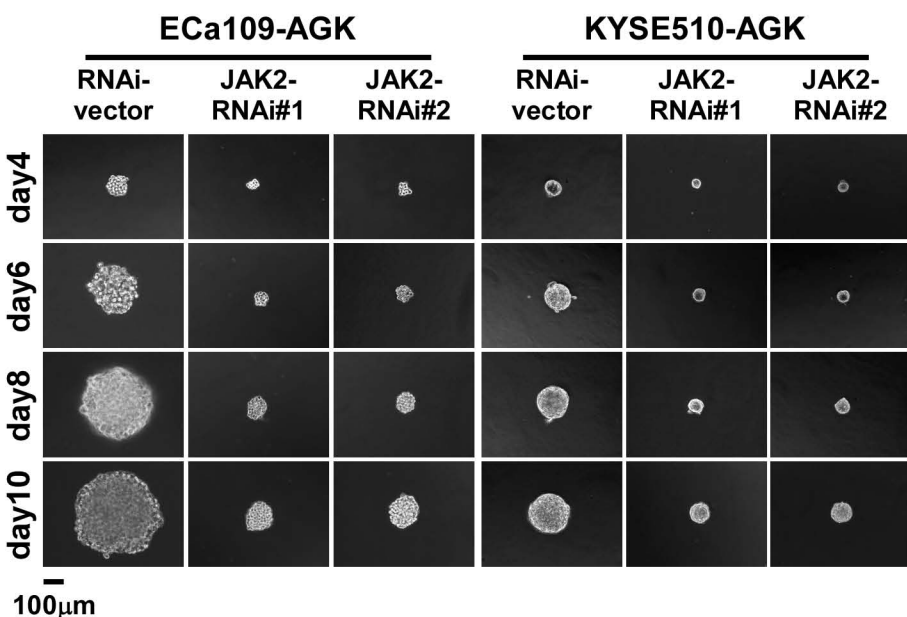

**B**

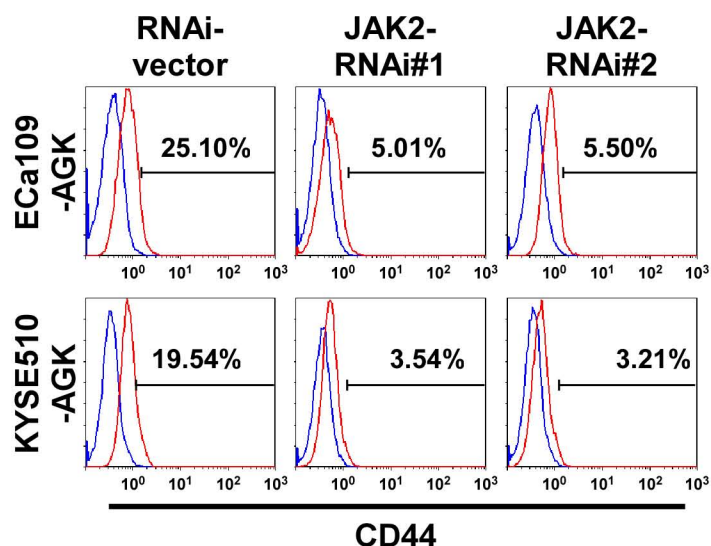

**C**

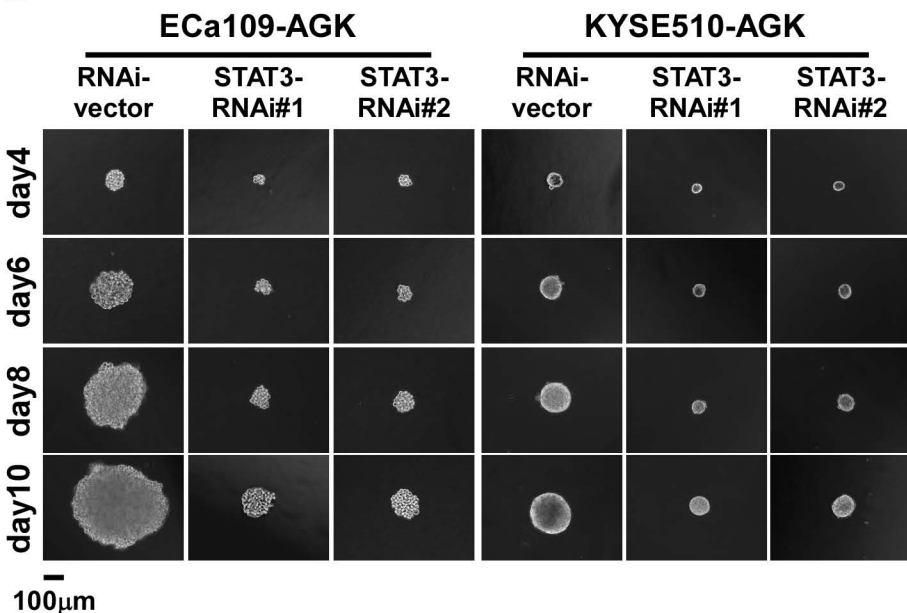

**Supplemental Figure 7. JAK2-STAT3 signaling is required for the promoting effect of AGK on cancer stem cell-associated phenotypes.**

- (A) Representative images of spheres formed by AGK overexpressing-cells infected with vector or JAK2 RNAi(s) taken on day 4, 6, 8, 10. Scale bar: 100  $\mu$ m.
- (B) Silencing JAK2 decreased the CD44<sup>+</sup> population sorted from the indicated AGK-transduced ESCC cells.
- (C) Representative images of spheres formed by AGK overexpressing-cells infected with vector or STAT3 RNAi(s) taken on day 4, 6, 8, 10. Scale bar: 100  $\mu$ m.



Supplemental Figure 8

A

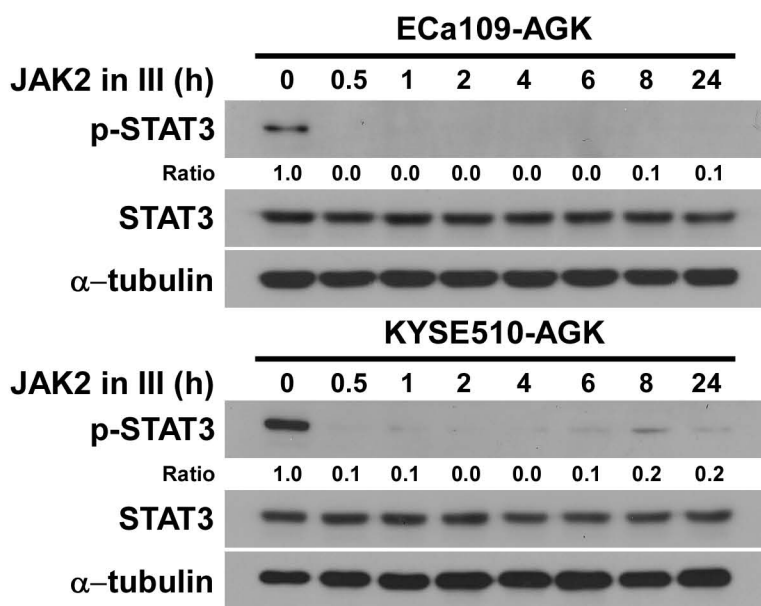

B

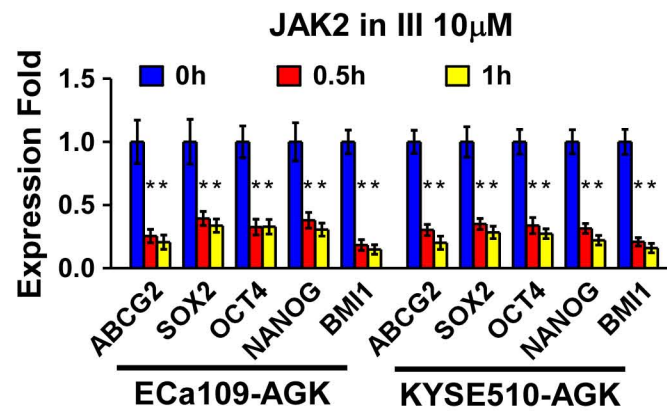

C

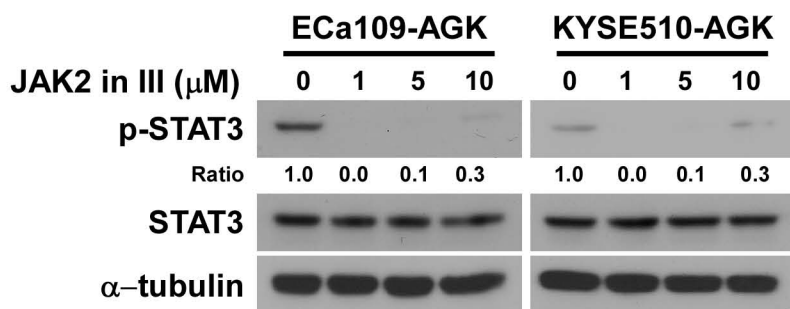

D

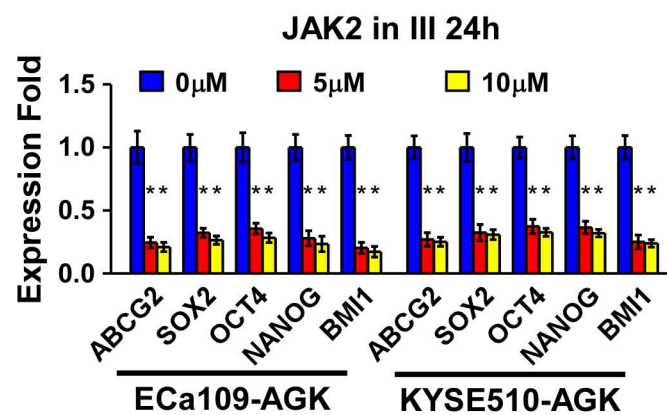

E

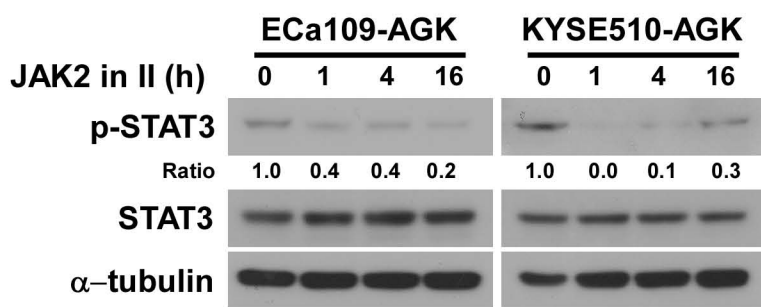

F

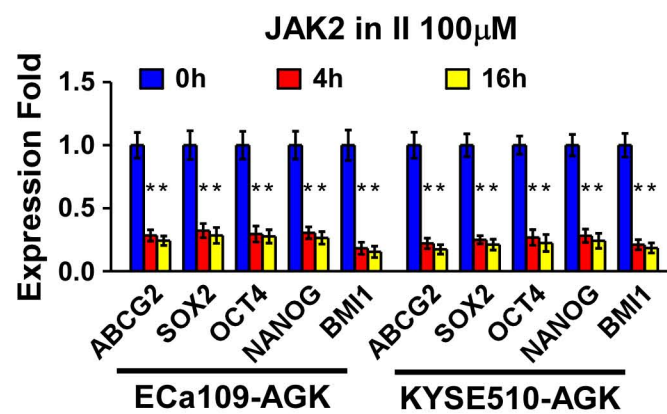

G

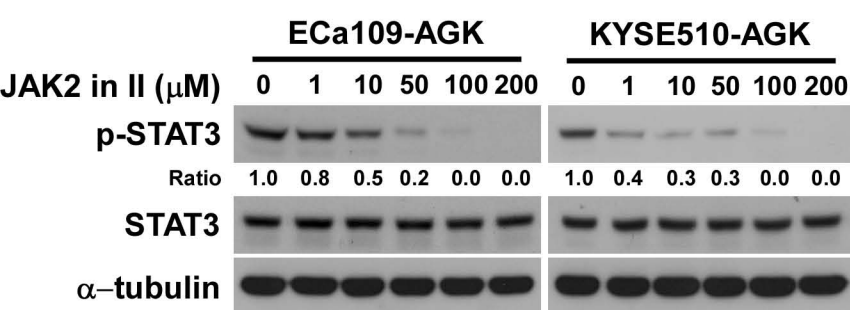

H

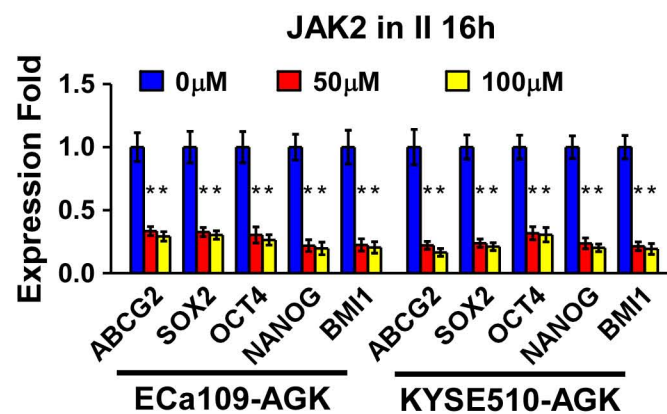

Supplemental Figure 8. Inhibition of JAK2 activity abrogates the ability of AGK to promote cancer stem cell-associated phenotypes.

(A and B) Western blotting analysis of p-STAT3 (Tyr705) expression (A) or real-time PCR analysis of the expression of pluripotency associated markers (B) in the indicated cells treated with JAK2 inhibitor III (10  $\mu$ M) for the indicated times.

(C and D) Western blotting analysis of p-STAT3 (Tyr705) expression (C) and real-time PCR analysis of the expression of pluripotency associated markers (D) in the indicated cells treated with the indicated concentrations of JAK2 inhibitor III for 24 h.

(E and F) Western blotting analysis of p-STAT3 (Tyr705) expression (E) and real-time PCR analysis of the expression of pluripotency associated markers (F) in the indicated cells treated with JAK2 inhibitor II (100  $\mu$ M) for the indicated times.

(G and H) Western blotting analysis of p-STAT3 (Tyr705) expression (G) and real-time PCR analysis of the expression of pluripotency associated markers (H) in the indicated cells treated with the indicated concentrations of JAK2 inhibitor II for 16 h.

 $\alpha$ -tubulin was used as a loading control. Error bars represent the mean  $\pm$  SD of three independent experiments, \*  $P < 0.05$ .

# Supplemental Figure 9

**A**

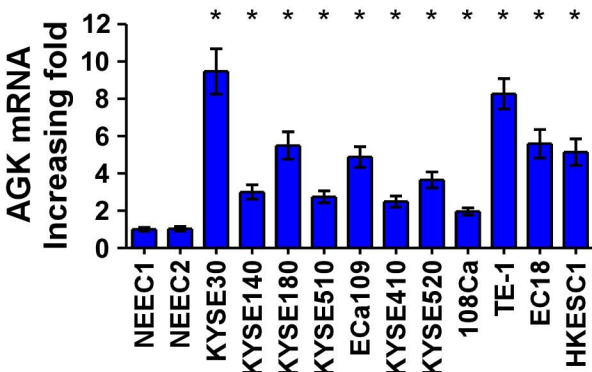

**B**

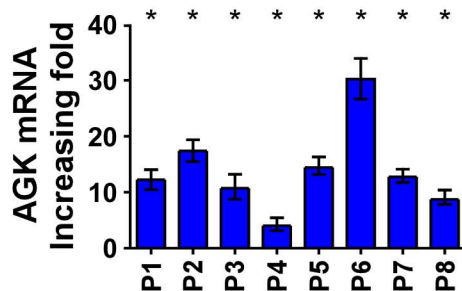

**Supplemental Figure 9. Expression of AGK mRNA is elevated in ESCC cell lines and tissues.**

- (A) Real-time PCR analysis of AGK mRNA in 2 primary cultured human normal esophageal epithelial cells (NEECs) and 11 ESCC cell lines.**
- (B) Real-time PCR analysis of AGK mRNA in 8 paired primary ESCC tissues (T) and the matched adjacent non-tumor tissues (ANT) from the same patient.**

Supplemental Figure 10

A

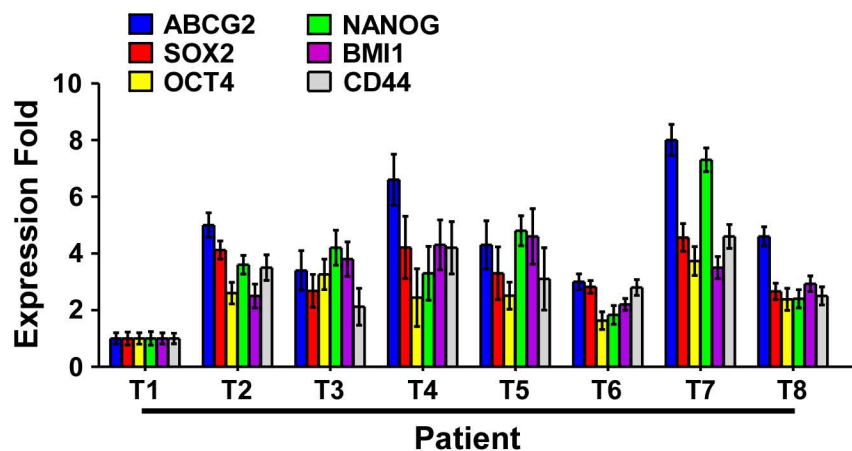

B

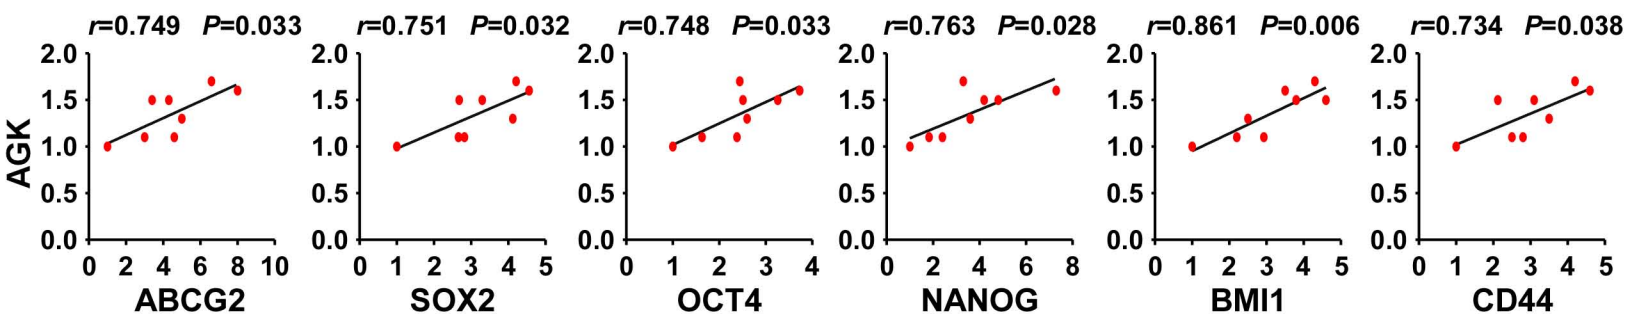

C

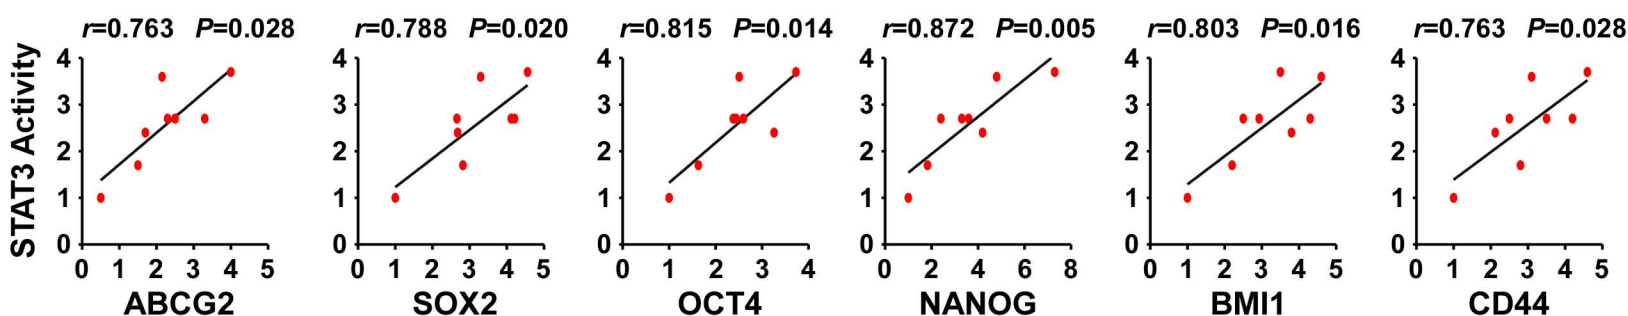

D

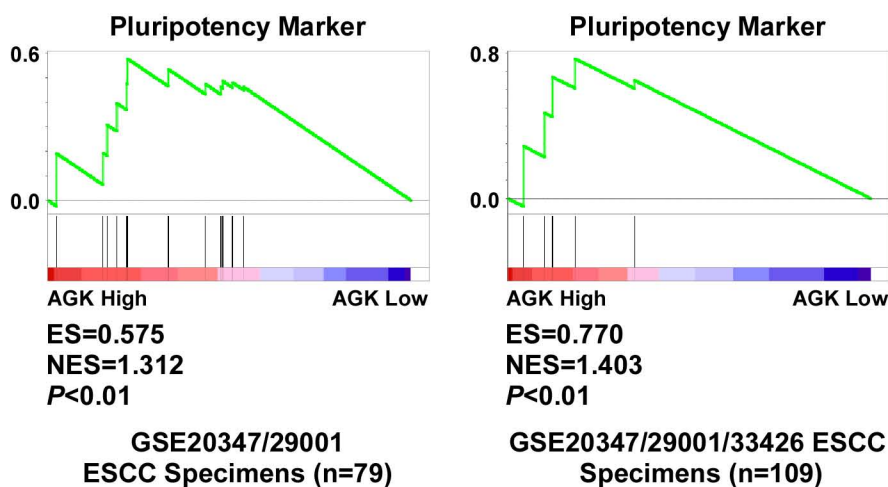

Supplemental Figure 10. AGK expression and JAK2-STAT3 activity correlate with the expression levels of pluripotency-associated factors in ESCC tissues.

(A) Real-time PCR analysis of the mRNA expression of pluripotency-associated factors, including *ABCG2*, *SOX2*, *OCT4*, *NANOG*, *BMI1* and *CD44*, in 8 freshly collected human ESCC samples.

(B and C) AGK expression (B) and JAK2-STAT3 activity (C) correlated significantly with the expression levels of pluripotency associated factors in freshly collected ESCC tissues.

(D) GSEA plot showing that AGK levels positively correlated with the expression of pluripotency-associated factors, between normal and tumor tissues (left panel) and within tumor tissues (right panel), through an analysis of published ESCC patient profiles.



# Supplemental Figure 11

**A**

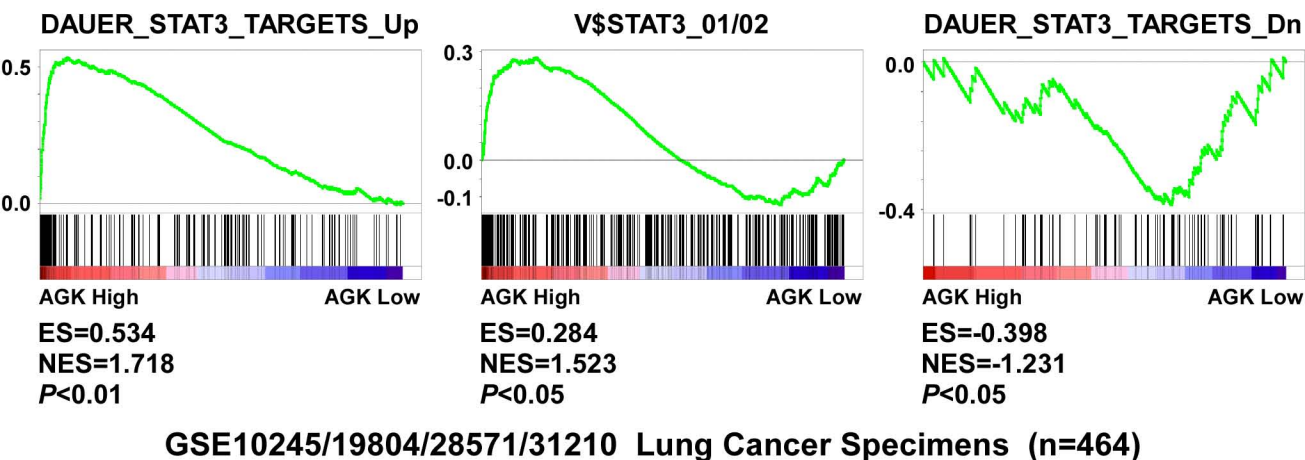

**B**

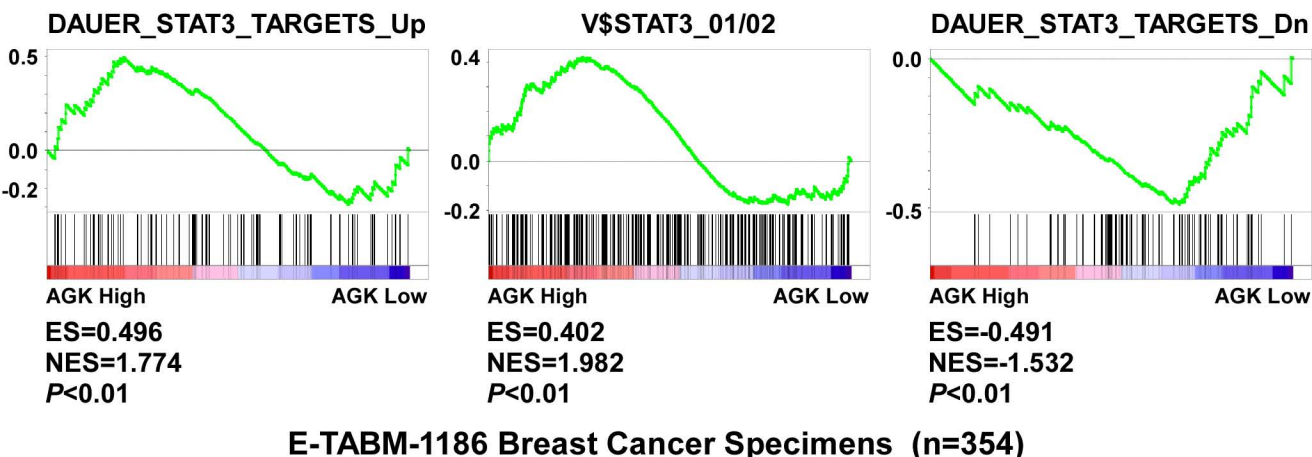

**Supplemental Figure 11. AGK levels correlate with STAT3 activity in lung cancer and breast cancer datasets.**

**(A-B)** GSEA plot showing significant correlations between AGK expression and the STAT3-activated gene signatures (DAUER\_STAT3\_TARGETS\_UP, V\$STAT3\_01/02) or STAT3-suppressed gene signatures (DAUER\_STAT3\_TARGETS\_Dn) in published lung cancer gene expression profiles (statistic performed within tumor tissues from GSE10245/19804/28571/31210,  $n = 464$ ) (A) and breast patient gene expression profiles (statistic performed within tumor tissues from E-TABM-1186,  $n = 354$ ) (B).

## Supplemental Figure 12

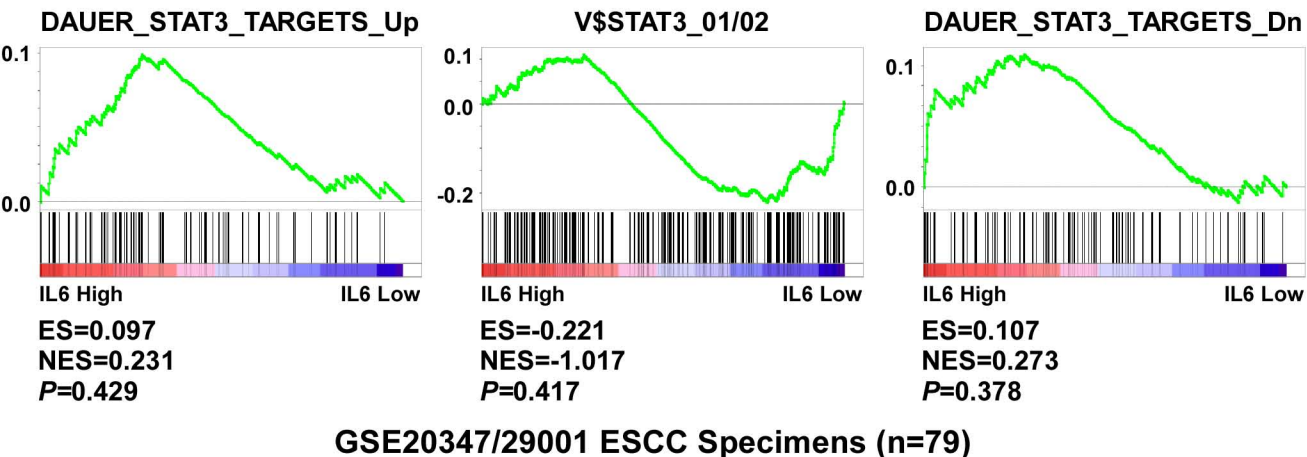

Supplemental Figure 12. Expression of IL6 does not correlate with STAT3 activation in clinical ESCC specimens.

GSEA plot showing no significant correlation between IL6 expression and the STAT3-activated gene signatures (DAUER\_STAT3\_TARGETS\_UP, V\$STAT3\_01/02) or STAT3-suppressed gene signatures (DAUER\_STAT3\_TARGETS\_Dn) in published ESCC patient gene expression profiles (NCBI/GEO/GSE20347 and GSE29001,  $n = 79$ ).
